# Supplementary material
Source: HighWire-hosted journal article supplement (http://bmjopen.bmj.com/highwire/filestream/93854/field_highwire_adjunct_files/0/bmjopen_research_checklist_000017.pdf)
Supplement: bmjopen_research_checklist_000017.pdf [file bmjopen_research_checklist_000017.pdf]

# Consolidated criteria for reporting qualitative research (COREQ): a 32-item checklist for interviews and focus groups

Table 1

Consolidated criteria for reporting qualitative studies (COREQ): 32-item checklist

| No                                                     | Item                     | Guide questions/description                                                                                                                                                                                                              |
|--------------------------------------------------------|--------------------------|------------------------------------------------------------------------------------------------------------------------------------------------------------------------------------------------------------------------------------------|
| <b>Domain 1:<br/>Research team<br/>and reflexivity</b> |                          |                                                                                                                                                                                                                                          |
| Personal<br>Characteristics                            |                          |                                                                                                                                                                                                                                          |
| 1.                                                     | Interviewer/facilitator  | Which author/s conducted the interview or focus group?<br>Both Authors                                                                                                                                                                   |
| 2.                                                     | Credentials              | What were the researcher's credentials? <i>E.g. PhD, MD</i><br><i>First author MA, MBChB, second author PhD MBChB</i>                                                                                                                    |
| 3.                                                     | Occupation               | What was their occupation at the time of the study?<br>Psychiatrist and generalist doctor working in psychiatry                                                                                                                          |
| 4.                                                     | Gender                   | Was the researcher male or female?<br>Both female                                                                                                                                                                                        |
| 5.                                                     | Experience and training  | What experience or training did the researcher have?<br>First author has done previous qualitative projects and attended several trainings and workshops. Second author has done PhD in psychology but not previous qualitative research |
| Relationship with participants                         |                          |                                                                                                                                                                                                                                          |
| 6.                                                     | Relationship established | Was a relationship established prior to study commencement?<br>Relationship was present with some of the participants, but otherwise relationship was not established prior to interviews.                                               |

| No                            | Item                                     | Guide questions/description                                                                                                                                                                                                                                                                              |
|-------------------------------|------------------------------------------|----------------------------------------------------------------------------------------------------------------------------------------------------------------------------------------------------------------------------------------------------------------------------------------------------------|
| 7.                            | Participant knowledge of the interviewer | <p>What did the participants know about the researcher? e.g. <i>personal goals, reasons for doing the research</i></p> <p>Personal interest in research and reasons for doing it were described prior to the interviews.</p>                                                                             |
| 8.                            | Interviewer characteristics              | <p>What characteristics were reported about the interviewer/facilitator? e.g. <i>Bias, assumptions, reasons and interests in the research topic</i></p> <p>Descriptions of interviewers experience of illness, types of work and approaches including references to publicly available written work.</p> |
| <b>Domain 2: study design</b> |                                          |                                                                                                                                                                                                                                                                                                          |
| Theoretical framework         |                                          |                                                                                                                                                                                                                                                                                                          |
| 9.                            | Methodological orientation and Theory    | <p>What methodological orientation was stated to underpin the study? e.g. <i>grounded theory, discourse analysis, ethnography, phenomenology, content analysis</i></p> <p>Grounded Theory</p>                                                                                                            |
| Participant selection         |                                          |                                                                                                                                                                                                                                                                                                          |
| 10.                           | Sampling                                 | <p>How were participants selected? e.g. <i>purposive, convenience, consecutive, snowball</i></p> <p>Purposive and snowball</p>                                                                                                                                                                           |
| 11.                           | Method of approach                       | <p>How were participants approached? e.g. <i>face-to-face, telephone, mail, email</i></p> <p>Face to face</p>                                                                                                                                                                                            |
| 12.                           | Sample size                              | <p>How many participants were in the study?</p> <p>25</p>                                                                                                                                                                                                                                                |
| 13.                           | Non-participation                        | <p>How many people refused to participate or dropped out? Reasons?</p> <p>Seven refused the invitation to participate. Reasons were not sought. None dropped out.</p>                                                                                                                                    |
| Setting                       |                                          |                                                                                                                                                                                                                                                                                                          |
| 14.                           | Setting of data collection               | <p>Where was the data collected? e.g. <i>home, clinic, workplace</i></p> <p>In a place selected by participants. All above options were included.</p>                                                                                                                                                    |

| No              | Item                         | Guide questions/description                                                                                                                                                                                      |
|-----------------|------------------------------|------------------------------------------------------------------------------------------------------------------------------------------------------------------------------------------------------------------|
| 15.             | Presence of non-participants | Was anyone else present besides the participants and researchers?<br>No                                                                                                                                          |
| 16.             | Description of sample        | What are the important characteristics of the sample? <i>e.g. demographic data, date</i><br>Demographic data as well as descriptions of other relevant aspects of the participants such as type of work they do. |
| Data collection |                              |                                                                                                                                                                                                                  |
| 17.             | Interview guide              | Were questions, prompts, guides provided by the authors? Was it pilot tested?<br>There was not pilot testing. Interview approach is described in the methods section                                             |
| 18.             | Repeat interviews            | Were repeat interviews carried out? If yes, how many?<br>3 repeat interviews were carried out.                                                                                                                   |
| 19.             | Audio/visual recording       | Did the research use audio or visual recording to collect the data?<br>Data was audio recorded.                                                                                                                  |
| 20.             | Field notes                  | Were field notes made during and/or after the interview or focus group?<br>N/A                                                                                                                                   |
| 21.             | Duration                     | What was the duration of the interviews or focus group?<br>Variable. From 50 minutes to 2 interviews of up to 90 minutes.                                                                                        |
| 22.             | Data saturation              | Was data saturation discussed?<br>No                                                                                                                                                                             |
| 23.             | Transcripts returned         | Were transcripts returned to participants for comment and/or correction?<br>Yes                                                                                                                                  |

### Domain 3: analysis and findingsz

#### Data analysis

|     |                                |                                                             |
|-----|--------------------------------|-------------------------------------------------------------|
| 24. | Number of data coders          | How many data coders coded the data?<br>Two                 |
| 25. | Description of the coding tree | Did authors provide a description of the coding tree?<br>No |
| 26. | Derivation of themes           | Were themes identified in advance or derived from the data? |

| No        | Item                         | Guide questions/description                                                                                                                                                                                                                                                        |
|-----------|------------------------------|------------------------------------------------------------------------------------------------------------------------------------------------------------------------------------------------------------------------------------------------------------------------------------|
| 27.       | Software                     | Derived from the data<br>What software, if applicable, was used to manage the data?<br>Nvivo                                                                                                                                                                                       |
| 28.       | Participant checking         | Did participants provide feedback on the findings?<br>They were invited to but did not respond to requests                                                                                                                                                                         |
| Reporting |                              |                                                                                                                                                                                                                                                                                    |
| 29.       | Quotations presented         | Were participant quotations presented to illustrate the themes / findings?<br>Yes<br>Was each quotation identified? e.g. <i>participant number</i><br>They were not identified in order to preserve confidentiality so no one person's story could be put together and identified. |
| 30.       | Data and findings consistent | Was there consistency between the data presented and the findings?<br>Yes                                                                                                                                                                                                          |
| 31.       | Clarity of major themes      | Were major themes clearly presented in the findings?<br>Yes                                                                                                                                                                                                                        |
| 32.       | Clarity of minor themes      | Is there a description of diverse cases or discussion of minor themes?<br>Yes                                                                                                                                                                                                      |
